# Supplementary material for: Signatures of cell stress and altered bioenergetics in skin fibroblasts from patients with multiple sclerosis
Source: PubMed Central journal article supplement (PMC7425440; doi:10.18632/aging.103612), 2020-07-08
Supplement: aging-12-103612-s001..pdf [file aging-12-103612-s001..pdf]

## SUPPLEMENTARY FIGURE

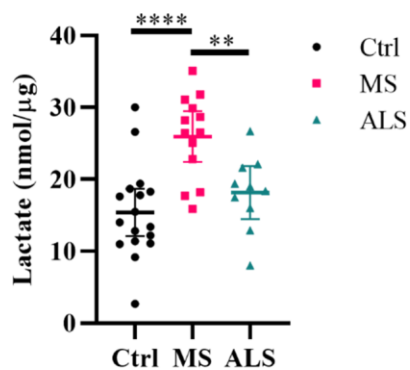

**Supplementary Figure 1. Lactate production is increased in MS skin fibroblasts.** Skin fibroblasts from MS (n = 13), ALS (n = 10), and control (n = 17) cells were incubated in media containing FBS for 24 hours. The lactate concentration in the spent media was determined and normalized to protein concentration (nmol lactate per  $\mu\text{g}$  protein). Significant changes between groups were determined using one-way ANOVA post hoc Tukey test. Each data point represents a unique skin fibroblast sample. The average of replicates is shown with the 95% confidence interval. \*\*,  $P < 0.01$ ; \*\*\*\*,  $P < 0.0001$ . Abbreviations: ALS, amyotrophic lateral sclerosis; Ctrl, control; MS, multiple sclerosis.
