# Supplementary material for: Signatures of cell stress and altered bioenergetics in skin fibroblasts from patients with multiple sclerosis
Source: publisher site journal article supplement (doi:10.18632/aging.103612), 2020-07-08
Supplement: Supplementary file [file aging-v12i14-103612-supplementary-material-SD2.pdf]

## SUPPLEMENTARY TABLES

**Supplementary Table 1. Skin fibroblasts used in study.**

| <b>Biotrust ID</b> | <b>Age (yr)</b> | <b>Sex</b> | <b>Diagnosis<sup>a</sup></b> | <b>Duration (yr)<sup>b</sup></b> |
|--------------------|-----------------|------------|------------------------------|----------------------------------|
| 011-BIOTR-0024     | 53              | Male       | Control                      | NA                               |
| 014-BIOTR-0015     | 38              | Male       | Control                      | NA                               |
| 014-BIOTR-0018     | 38              | Female     | Control                      | NA                               |
| 014-BIOTR-0022     | 33              | Female     | Control                      | NA                               |
| 014-BIOTR-0025     | 51              | Female     | Control                      | NA                               |
| 014-BIOTR-0026     | 52              | Female     | Control                      | NA                               |
| 014-BIOTR-0028     | 39              | Female     | Control                      | NA                               |
| 014-BIOTR-0033     | 25              | Male       | Control                      | NA                               |
| 100-BIOTR-0012     | 54              | Female     | Control                      | NA                               |
| 100-BIOTR-0020     | 44              | Male       | Control                      | NA                               |
| 100-BIOTR-0022     | 30              | Male       | Control                      | NA                               |
| 100-BIOTR-0023     | 54              | Female     | Control                      | NA                               |
| 100-BIOTR-0024     | 25              | Male       | Control                      | NA                               |
| 100-BIOTR-0026     | 65              | Female     | Control                      | NA                               |
| 100-BIOTR-0027     | 59              | Male       | Control                      | NA                               |
| 100-BIOTR-0033     | 68              | Male       | Control                      | NA                               |
| 100-BIOTR-0034     | 70              | Female     | Control                      | NA                               |
| 100-BIOTR-0038     | 28              | Male       | Control                      | NA                               |
| 100-BIOTR-0039     | 66              | Male       | Control                      | NA                               |
| 100-BIOTR-0040     | 74              | Female     | Control                      | NA                               |
| 100-BIOTR-0042     | 48              | Male       | Control                      | NA                               |
| 100-BIOTR-0044     | 33              | Male       | Control                      | NA                               |
| 100-BIOTR-0045     | 34              | Male       | Control                      | NA                               |
| 100-BIOTR-0046     | 37              | Female     | Control                      | NA                               |
| 019-BIOTR-0001     | 31              | Male       | RRMS                         | 2.6                              |
| 019-BIOTR-0002     | 46              | Male       | RRMS                         | 2.2                              |
| 019-BIOTR-0009     | 32              | Female     | RRMS                         | 3.1                              |
| 019-BIOTR-0014     | 39              | Female     | RRMS                         | 3.4                              |
| 019-BIOTR-0019     | 51              | Female     | RRMS                         | 10.1                             |
| 019-BIOTR-0021     | 66              | Female     | RRMS                         | 1.9                              |
| 019-BIOTR-0026     | 50              | Female     | RRMS                         | 29.3                             |
| 019-BIOTR-0028     | 44              | Male       | RRMS                         | 0.2                              |
| 019-BIOTR-0029     | 59              | Male       | RRMS                         | 16.7                             |
| 019-BIOTR-0030     | 70              | Female     | SPMS                         | 14.9                             |
| 019-BIOTR-0031     | 66              | Female     | RRMS                         | 7.8                              |
| 019-BIOTR-0034     | 62              | Female     | RRMS                         | 20.5                             |
| 019-BIOTR-0035     | 69              | Female     | RRMS                         | 20.4                             |
| 019-BIOTR-0036     | 54              | Female     | RRMS                         | 12.5                             |

|                |    |        |      |      |
|----------------|----|--------|------|------|
| 019-BIOTR-0037 | 18 | Female | RRMS | 0.7  |
| 019-BIOTR-0040 | 36 | Male   | RRMS | 1.5  |
| 019-BIOTR-0041 | 39 | Male   | RRMS | 1.9  |
| 019-BIOTR-0045 | 43 | Female | RRMS | 0.4  |
| 019-BIOTR-0050 | 43 | Female | CIS  | 0.8  |
| 019-BIOTR-0054 | 49 | Male   | RRMS | 4.0  |
| 019-BIOTR-0055 | 72 | Male   | RRMS | 11.5 |
| 019-BIOTR-0061 | 56 | Male   | RRMS | 10.7 |
| 019-BIOTR-0063 | 46 | Female | RRMS | 20.8 |
| 019-BIOTR-0068 | 50 | Male   | RRMS | 14.3 |
| 019-BIOTR-0069 | 30 | Female | RRMS | 0.3  |
| 019-BIOTR-0072 | 40 | Female | RRMS | 0.7  |
| 019-BIOTR-0073 | 39 | Male   | RRMS | 2.4  |
| 019-BIOTR-0075 | 38 | Female | RRMS | 1.5  |
| 019-BIOTR-0082 | 54 | Female | RRMS | 0.1  |
| 019-BIOTR-0083 | 56 | Female | SPMS | 8.6  |
| 009-BIOTR-0013 | 62 | Female | ALS  | 1.6  |
| 009-BIOTR-0017 | 56 | Female | ALS  | 6.1  |
| 009-BIOTR-0018 | 42 | Female | ALS  | 0.9  |
| 009-BIOTR-0020 | 33 | Female | ALS  | 2.7  |
| 009-BIOTR-0029 | 52 | Male   | ALS  | 2.0  |
| 009-BIOTR-0032 | 63 | Male   | ALS  | 0.9  |
| 009-BIOTR-0033 | 45 | Male   | ALS  | 1.8  |
| 009-BIOTR-0038 | 71 | Male   | ALS  | 3.0  |
| 009-BIOTR-0059 | 72 | Female | ALS  | 4.0  |
| 009-BIOTR-0060 | 36 | Male   | ALS  | 2.5  |

<sup>a</sup>Diagnosis at time of skin fibroblast harvest.

<sup>b</sup>Time in years from disease onset to skin fibroblast harvest.

Abbreviations: ALS, amyotrophic lateral sclerosis; CIS, clinically isolated syndrome; NA, not applicable; RRMS, relapsing-remitting multiple sclerosis; SPMS, secondary progressive multiple sclerosis; yr, years.

**Supplementary Table 2. Sequence of RT-PCR primers.**

| Gene         | Forward Primer             | Reverse Primer                |
|--------------|----------------------------|-------------------------------|
| <i>ACTB</i>  | GCCAACACAGTGCTGTCTGG       | CTGCTTGCTGATCCACATCTGC        |
| <i>ATF4</i>  | GTTCTCCAGCGACAAGGCTA       | ATCCTGCTTGCTGTTGTTGG          |
| <i>BIP</i>   | TGTTCAACCAATTATCAGCAAACCTC | TTCTGCTGTATCCTCTTCACCAGT      |
| <i>CHOP</i>  | AGAACCAGGAAACGGAAACAGA     | TTCCTTCATGCGCTGCTTT           |
| <i>GRP94</i> | GAAACGGATGCCTGGTGG         | GCCCCTTCTTCCTGGGTC            |
| <i>P16</i>   | GTGAGAGTGGCGGGGTC          | CCCAACGCACCGAATAGTTA          |
| <i>P21</i>   | GCCATTAGCGCATCACAGT        | ACCGAGGCACTCAGAGGAG           |
| <i>P53</i>   | CTGCCCTCAACAAGATGTTTTTG    | CGGGCAGCTTCCTCTATGTTTATGTTATC |
| <i>TBP</i>   | GCCAGCTTCGGAGAGTTCTGGGATT  | CGGGCACGAAGTGCAATGGTCTTTA     |

Abbreviations: *ACTB*, actin beta; *ATF4*, activating transcription factor 4; *BIP*, heat shock protein family A member 5, HSPA5/BIP; *CHOP*, DNA damage inducible transcript 3, DDIT3/CHOP; *GRP94*, heat shock protein 90 beta family member 1, HSP90B1/GRP94; *P16*, cyclin dependent kinase inhibitor 2A, CDKN2A/P16; *P21*, cyclin dependent kinase inhibitor 1A, CDKN1A/P21; *P53*, tumor protein p53; *TBP*, TATA box protein.

**Supplementary Table 3. Metabolites and standards analyzed by mass spectrometry.**

| Common name                | Company                        | Cat. #      | HMDB        |
|----------------------------|--------------------------------|-------------|-------------|
| L-Lactic acid              | Sigma                          | 71720       | HMDB0000190 |
| Pyruvic acid               | Sigma                          | 107360      | HMDB0000243 |
| 2-Hydroxybutyric acid      | Sigma                          | 54917       | HMDB0000008 |
| 3-Hydroxybutyric acid      | Fisher Scientific              | AC121050100 | HMDB0000357 |
| 2-Ketobutyric acid         | Sigma                          | K401        | HMDB0000005 |
| alpha-Ketoisovaleric acid  | Sigma                          | 198994      | HMDB0000019 |
| 3-Methyl-2-oxovaleric acid | Sigma                          | K7125       | HMDB0000491 |
| Ketoleucine                | Sigma                          | 68255       | HMDB0000695 |
| 3-Hydroxyisovaleric acid   | VU Medical Center (Ten Brink)  | 4914        | HMDB0000754 |
| Acetoacetic acid           | Sigma                          | A8509       | HMDB0000060 |
| Succinic acid              | Sigma                          | S3674       | HMDB0000254 |
| Fumaric acid               | Sigma                          | 47910       | HMDB0000134 |
| 3-Methylglutaconic acid    | Sigma                          | 06689       | HMDB0000522 |
| Malic acid                 | Sigma                          | 240176      | HMDB0000744 |
| Oxoglutaric acid           | Sigma                          | K1750       | HMDB0000208 |
| Citric acid                | Sigma                          | C0759       | HMDB0000094 |
| cis-Aconitic acid          | Sigma                          | A3412       | HMDB0000072 |
|                            | CDN Isotopes                   | D-2273      |             |
|                            | Sigma                          | 490717      |             |
|                            | Sigma                          | 488895      |             |
|                            | Cambridge Isotope Laboratories | DLM-3487    |             |
|                            | Cambridge Isotope Laboratories | CLM-6820    |             |
|                            | Cambridge Isotope Laboratories | CLM-4418    |             |
|                            | Cambridge Isotope Laboratories | CLM-1084    |             |
|                            | Cambridge Isotope Laboratories | CLM-1529    |             |
|                            | Sigma                          | 702250      |             |
|                            | CDN Isotopes                   | D-2122      |             |
|                            | Cambridge Isotope Laboratories | CLM-4442    |             |
|                            | VU Medical Center (Ten Brink)  | 4910        |             |

Abbreviations: HMDB, human metabolome database.

**Supplementary Table 4. Summary of skin fibroblasts used in each assay.**

| Assay                                                                          | Status  | Number | % Female | Average age (years) | SD   | Two-sample t-test <sup>a</sup> | Fishers exact test <sup>b</sup> |
|--------------------------------------------------------------------------------|---------|--------|----------|---------------------|------|--------------------------------|---------------------------------|
| Markers <i>BIP</i> , <i>CHOP</i> , <i>ATF4</i> , <i>GRP94</i> , and <i>P53</i> | Control | 20     | 50.0     | 46.8                | 14.6 | 0.66                           | 1.0                             |
|                                                                                | MS      | 22     | 54.5     | 44.9                | 12.9 |                                |                                 |
|                                                                                | ALS     | 9      | 44.4     | 52.9                | 14.8 |                                |                                 |
| Markers <i>P16</i> and <i>P21</i>                                              | Control | 13     | 53.8     | 48.3                | 16.9 | 0.93                           | 0.51                            |
|                                                                                | MS      | 26     | 65.4     | 47.8                | 13.9 |                                |                                 |
|                                                                                | ALS     | 10     | 50.0     | 53.2                | 13.9 |                                |                                 |
| MTT assay                                                                      | Ctrl    | 16     | 56.3     | 49.2                | 13.1 | 0.61                           | 1.0                             |
|                                                                                | MS      | 10     | 50.0     | 47.1                | 7.8  |                                |                                 |
|                                                                                | ALS     | 10     | 50.0     | 53.2                | 13.9 |                                |                                 |
| CellTox assay                                                                  | Ctrl    | 13     | 53.8     | 49.4                | 11.4 | 0.92                           | 1.0                             |
|                                                                                | MS      | 8      | 50.0     | 49.0                | 7.6  |                                |                                 |
|                                                                                | ALS     | 10     | 50.0     | 53.2                | 13.9 |                                |                                 |
| Seahorse assay                                                                 | Ctrl    | 8      | 50.0     | 51.0                | 15.5 | 0.87                           | 1.0                             |
|                                                                                | MS      | 8      | 50.0     | 52.3                | 15.5 |                                |                                 |
|                                                                                | ALS     | 8      | 50.0     | 53.0                | 15.8 |                                |                                 |
| Lactate assay, 24 hours without FBS                                            | Control | 21     | 47.6     | 48.0                | 14.6 | 0.84                           | 0.39                            |
|                                                                                | MS      | 29     | 62.1     | 48.8                | 13.1 |                                |                                 |
|                                                                                | ALS     | 10     | 50.0     | 53.2                | 13.9 |                                |                                 |
| Lactate assay, 48 hours without FBS                                            | Control | 20     | 50.0     | 49.1                | 14.0 | 0.45                           | 0.77                            |
|                                                                                | MS      | 25     | 56.0     | 46.0                | 12.6 |                                |                                 |
|                                                                                | ALS     | 9      | 44.4     | 52.9                | 14.8 |                                |                                 |
| Lactate assay, 24 hours with FBS                                               | Control | 17     | 52.9     | 49.8                | 15.5 | 0.65                           | 1.0                             |
|                                                                                | MS      | 13     | 61.5     | 47.5                | 12.2 |                                |                                 |
|                                                                                | ALS     | 10     | 50.0     | 53.2                | 13.9 |                                |                                 |

<sup>a</sup>Significance for group comparisons (MS vs control) was calculated using two-sample t-test (two-tailed).

<sup>b</sup>Fisher's exact test was used to determine significance for categorical variables (MS vs control).

Abbreviations: ALS, amyotrophic lateral sclerosis; ATF4, activating transcription factor 4; BIP, heat shock protein family A member 5, HSPA5/BIP; CHOP, DNA damage inducible transcript 3, DDIT3/CHOP; FBS, fetal bovine serum; GRP94, heat shock protein 90 beta family member 1, HSP90B1/GRP94; MS, multiple sclerosis; MTT, 3-(4,5-dimethylthiazol-2-yl)-2,5-diphenyltetrazolium bromide; P16, cyclin dependent kinase inhibitor 2A, CDKN2A/P16; P21, cyclin dependent kinase inhibitor 1A, CDKN1A/P21; P53, tumor protein p53; and SD, standard deviation.
